# Supplementary material for: Responsiveness of the Spanish Version of Newcastle Stroke-Specific Quality of Life Measure (NEWSQOL)
Source: MDPI journal article supplement (doi:10.3390/ijerph181910034), 2021-09-24
Supplement: s1 [file s1]

---

## Spanish version of NEWSQOL.

---

### Movilidad (0-27)

- |                                                                |                                                             |
|----------------------------------------------------------------|-------------------------------------------------------------|
| 1. ¿Se desplaza en silla de ruedas?                            | No: 0 / Puntualmente: 1 / Algunas veces: 2 / Siempre: 3     |
| 2. ¿Tiene dificultad para caminar 800 metros?                  | No: 0 / Algo: 1 / Mucha: 2 / No puedo: 3                    |
| 3. ¿Tiene dificultad para subir o bajar pendientes?            | No: 0 / Algo: 1 / Mucha: 2 / No puedo: 3                    |
| 4. ¿Camina con bastón, andador o sujetándose a algo?           | No: 0 / Algunas veces: 1 / Siempre: 2 / No puedo caminar: 3 |
| 5. ¿Piensa que camina despacio?                                | No: 0 / Bastante: 1 / Mucho: 2 / No puedo caminar: 3        |
| 6. ¿Tiene dificultad para subir o bajar escaleras solo?        | No: 0 / Algo: 1 / Mucha: 2 / No puedo: 3                    |
| 7. ¿Tiene dificultad para agacharse?                           | No: 0 / Alguna: 1 / Mucha: 2 / No puedo: 3                  |
| 8. ¿Se siente inestable cuando está de pie?                    | No: 0 / Bastante: 1 / Mucho: 2 / No puedo mantenerme: 3     |
| 9. ¿Tiene dificultad para mantenerse de pie durante un tiempo? | No: 0 / Poca: 1 / Mucha: 2 / No puedo: 3                    |
- 

### Actividades de la vida diaria (0-24)

- |                                                                                           |                                            |
|-------------------------------------------------------------------------------------------|--------------------------------------------|
| 10. ¿Tiene dificultad con las tareas domésticas?                                          | No: 0 / Alguna: 1 / Mucha: 2 / No puedo: 3 |
| 11. ¿Tiene dificultad para cocinar?                                                       | No: 0 / Alguna: 1 / Mucha: 2 / No puedo: 3 |
| 12. ¿Le resulta difícil preparar la comida, cortar una rebanada de pan o cortar verduras? | No: 0 / Algo: 1 / Mucho: 2 / No puedo: 3   |
| 13. ¿Tiene dificultad para hacerse cargo de las compras?                                  | No: 0 / Algo: 1 / Mucha: 2 / No puedo: 3   |
| 14. ¿Le resulta difícil usar el transporte público?                                       | No: 0 / Algo: 1 / Mucho: 2 / No puedo: 3   |
| 15. ¿Le resulta difícil asearse solo?                                                     | No: 0 / Algo: 1 / Mucho: 2 / No puedo: 3   |
| 16. ¿Le resulta difícil vestirse, incluidos cremalleras y botones?                        | No: 0 / Algo: 1 / Mucho: 2 / No puedo: 3   |
| 17. ¿Tiene dificultad para entrar o salir de la bañera/ducha solo?                        | No: 0 / Alguna: 1 / Mucha: 2 / No puedo: 3 |
- 

### Dolor (0-9)

- |                                                  |                                                            |
|--------------------------------------------------|------------------------------------------------------------|
| 18. ¿Tiene dolor?                                | No: 0 / Un poco: 1 / Bastante: 2 / Mucho: 3                |
| 19. ¿Con qué frecuencia sufre dolor?             | Nunca: 0 / Puntualmente: 1 / Algunas veces: 2 / Siempre: 3 |
| 20. ¿Tiene dificultad para coger cosas pequeñas? | No: 0 / Alguna: 1 / Mucha: 2 / No puedo: 3                 |
- 

### Visión (0-6)

- |                                  |                                          |
|----------------------------------|------------------------------------------|
| 21. ¿Tiene problemas de visión?  | No: 0 / Leve: 1 / Moderado: 2 / Grave: 3 |
| 22. ¿Tiene dificultad para leer? | No: 0 / Algo: 1 / Mucha: 2 / No puedo: 3 |
-

---

**Cognición (0-15)**

23. ¿Tiene dificultad para resolver problemas o tomar decisiones? No: 0 / Poca: 1 / Bastante: 2 / Mucha: 3
24. ¿Hay veces que olvida lo que ha dicho o lo que le dicen? No: 0 / Puntualmente: 1 / Algunas veces: 2 / Siempre: 3
25. ¿Le resulta difícil concentrarse? No: 0 / Un poco: 1 / Bastante: 2 / Mucho: 3
26. ¿Se le siguen olvidando cosas? No: 0 / Puntualmente: 1 / Algunas veces: 2 / Siempre: 3
27. ¿Le resulta difícil pensar con claridad? No: 0 / Un poco: 1 / Bastante: 2 / Mucho: 3
- 

**Comunicación (0-12)**

28. ¿Siente como si su pronunciación no fuese correcta? No: 0 / Un poco: 1 / Bastante: 2 / Mucho: 3
29. ¿Tiene dificultad para hacerse entender? No: 0 / Un poco: 1 / Bastante: 2 / Mucho: 3
30. ¿Hay ocasiones en las que tiene dificultad para expresarse? No: 0 / Puntualmente: 1 / Algunas veces: 2 / Siempre: 3
31. ¿Tiene dificultad para escribir? No: 0 / Alguna: 1 / Mucha: 2 / No puedo: 3
- 

**Sentimientos (0-18)**

32. ¿Se siente menos independiente de lo que era? No: 0 / Un poco: 1 / Bastante: 2 / Mucho: 3
33. ¿Ha variado el ictus la percepción de sí mismo? No: 0 / Un poco: 1 / Bastante: 2 / Mucho: 3
34. ¿Hasta qué punto diría que su vida ha cambiado? No: 0 / Un poco: 1 / Bastante: 2 / Mucho: 3
35. ¿Se siente deprimido? No: 0 / Puntualmente: 1 / A veces: 2 / Siempre: 3
36. ¿Se siente inútil? No: 0 / Un poco: 1 / Bastante: 2 / Completamente: 3
37. ¿Siente que tiene menos control sobre lo que está pasando en su vida? No: 0 / Un poco: 1 / Mucho menos: 2 / Ningún control: 3
- 

**Relaciones interpersonales (0-18)**

38. ¿Discute más con sus amigos íntimos o familiares? No: 0 / Un poco: 1 / Mucho: 2 / A todas horas: 3
39. ¿Hay más tensión en la relación con su pareja? No: 0 / Un poco: 1 / Bastante: 2 / Muchísima: 3
40. ¿Interfiere el ictus en su vida sexual? ¿Cuánto? No: 0 / Un poco: 1 / Bastante: 2 / Mucho: 3
41. ¿Está más irritable? No: 0 / Un poco: 1 / Bastante: 2 / Mucho: 3
42. ¿Es menos tolerante? No: 0 / Un poco: 1 / Bastante: 2 / Mucho: 3
43. ¿Le pone nervioso quedar con gente? No: 0 / Un poco: 1 / Bastante: 2 / Mucho: 3
- 

**Emociones (0-12)**

44. ¿Se nota más sensible? No: 0 / Un poco: 1 / Bastante: 2 / Mucho: 3
45. ¿A veces llora por la mínima cosa? No: 0 / Puntualmente: 1 / A veces: 2 / Siempre: 3

- |                                                          |                                                 |
|----------------------------------------------------------|-------------------------------------------------|
| 46. ¿Está preocupado porque podría tener otro ictus?     | No: 0 / Un poco: 1 / Bastante: 2 / Mucho: 3     |
| 47. ¿Le preocupa volverse dependiente de otras personas? | No: 0 / Un poco: 1 / Bastante: 2 / Muchísimo: 3 |
- 

**Sueño (0-18)**

- |                                                  |                                                   |
|--------------------------------------------------|---------------------------------------------------|
| 48. ¿Tiene problemas para dormir por la noche?   | No: 0 / Puntualmente: 1 / A veces: 2 / Siempre: 3 |
| 49. ¿Tiene dificultades para conciliar el sueño? | No: 0 / Puntualmente: 1 / A veces: 2 / Siempre: 3 |
| 50. ¿A veces se despierta demasiado temprano?    | No: 0 / Puntualmente: 1 / A veces: 2 / Siempre: 3 |
| 51. ¿Encuentra que necesita descansar mucho?     | No: 0 / Puntualmente: 1 / A veces: 2 / Siempre: 3 |
| 52. ¿Se siente agotado?                          | No: 0 / Puntualmente: 1 / A veces: 2 / Siempre: 3 |
| 53. ¿Siente que le falta energía?                | No: 0 / Puntualmente: 1 / A veces: 2 / Siempre: 3 |
- 

**Fatiga (0-9)**

- |                                                 |                                                   |
|-------------------------------------------------|---------------------------------------------------|
| 54. ¿Hay días que podría dormir todo el tiempo? | No: 0 / Puntualmente: 1 / A veces: 2 / Siempre: 3 |
| 55. ¿Dormita durante el día?                    | No: 0 / Puntualmente: 1 / A veces: 2 / Siempre: 3 |
| 56. ¿Se siente con pocas ganas de hacer cosas?  | No: 0 / Puntualmente: 1 / A veces: 2 / Siempre: 3 |
-
